# Supplementary material
Source: publisher site journal article supplement (https://www.dovepress.com/article/412747)
Supplement: Supplementary file 1 [file get_supplementary_file.php]

#1 “Diabetes Mellitus” [MeSH]

#2 diabet*[Title/Abstract]

#3 glucose[Title/Abstract]

#4 #1 OR #2 OR #3

#5 "Ferroptosis"[Mesh]

#6 ferropto*[Title/Abstract]

#7 "iron death"[Title/Abstract]

#8 (iron[Title/Abstract]) AND ("cell death"[Title/Abstract])

#9 #5 OR #6 OR #7 OR #8

#10 #4 AND #9

#11 #10 from 2012 – 2022

#12 ((review[Publication Type]) OR (systematic review[Publication Type])) OR (meta-analysis[Publication Type])

#13 #11 NOT #12
